# Supplementary material
Source: publisher figshare collection journal article supplement (https://acs.figshare.com/ndownloader/files/5060896)
Supplement: Supplementary file 1 [file 5060896]

data_237F50_publ

_pd_block_id
  2005-03-18T16:16|237F50|gRbTf___f:50|Overall

_audit_creation_method  "from EXP file using GSAS2CIF"
_audit_creation_date                   2005-03-18T16:16
_audit_author_name                     "gRbTf   f:50"
_audit_update_record
; 2005-03-18T16:16  Initial CIF as created by GSAS2CIF
;

#=============================================================================
# this information describes the project, paper etc. for the CIF             #
# Acta Cryst. Section C papers and editorial correspondence is generated     #
# from the information in this section                                       #
#                                                                            #
#   (from)   CIF submission form for Rietveld refinements (Acta Cryst. C)    #
#                                                 Version 14 December 1998   #
#=============================================================================
# 1. SUBMISSION DETAILS

_publ_contact_author
;
        Martin Jansen 
        Max-Planck-Institut f\"ur Festk\"orperforschung 
        Heisenbergstr. 1 
        70569 Stuttgart 
        Germany
;
_publ_contact_author_email           M.Jansen@fkf.mpg.de
_publ_contact_author_fax             '0049 711 689-1502'
_publ_contact_author_phone           '0049 711 689-1501'

_publ_contact_letter
;
  Please consider this CIF submission for publication in "Inorganic Chemistry".
;

_publ_requested_journal              ?
_publ_requested_coeditor_name        ?
_publ_requested_category             ?

#==============================================================================

# 2. PROCESSING SUMMARY (IUCr Office Use Only)

_journal_data_validation_number      ?

_journal_date_recd_electronic        ?
_journal_date_to_coeditor            ?
_journal_date_from_coeditor          ?
_journal_date_accepted               ?
_journal_date_printers_first         ?
_journal_date_printers_final         ?
_journal_date_proofs_out             ?
_journal_date_proofs_in              ?
_journal_coeditor_name               ?
_journal_coeditor_code               ?
_journal_coeditor_notes
; ?
;
_journal_techeditor_code             ?
_journal_techeditor_notes
; ?
;
_journal_coden_ASTM                  ?
_journal_name_full                   ?
_journal_year                        ?
_journal_volume                      ?
_journal_issue                       ?
_journal_page_first                  ?
_journal_page_last                   ?
_journal_paper_category              ?
_journal_suppl_publ_number           ?
_journal_suppl_publ_pages            ?

#==============================================================================

# 3. TITLE AND AUTHOR LIST

_publ_section_title
; 
 Crystal Structure and Ionic Conductivity of three polymorphic phases of 
Rubidium Trifluoromethyl Sulfonate, RbSO3CF3

;
_publ_section_title_footnote
; ?
;

# The loop structure below should contain the names and addresses of all
# authors, in the required order of publication. Repeat as necessary.

loop_
	_publ_author_name
        _publ_author_footnote
	_publ_author_address
      'Hildebrandt, Lars'
;     Max-Planck-Institut f\"ur Festk\"orperforschung 
      Heisenbergstr. 1 
      70569 Stuttgart 
      Bundesrepublik Deutschland
;
      'Dinnebier, Robert'
;     Max-Planck-Institut f\"ur Festk\"orperforschung 
      Heisenbergstr. 1 
      70569 Stuttgart 
      Bundesrepublik Deutschland
;
      'Jansen, Martin'
;     Max-Planck-Institut f\"ur Festk\"orperforschung 
      Heisenbergstr. 1 
      70569 Stuttgart 
      Bundesrepublik Deutschland
;

#==============================================================================

# 4. TEXT

_publ_section_synopsis
;  ?
;
_publ_section_abstract
; ?
;
_publ_section_comment
; ?
;
_publ_section_exptl_prep      # Details of the preparation of the sample(s)
                              # should be given here.
; ?
;
_publ_section_exptl_refinement
; ?
;
_publ_section_references
; ?
;
_publ_section_figure_captions
; ?
;
_publ_section_acknowledgements
; ?
;

#=============================================================================
# 5. OVERALL REFINEMENT & COMPUTING DETAILS

_refine_special_details
; ?
;
_pd_proc_ls_special_details
; ?
;

# The following items are used to identify the programs used.
_computing_molecular_graphics     ?
_computing_publication_material   ?

_refine_ls_weighting_scheme       ?
_refine_ls_weighting_details      ?
_refine_ls_hydrogen_treatment     ?
_refine_ls_extinction_method      ?
_refine_ls_extinction_coef        ?
_refine_ls_number_constraints     ?

_refine_ls_restrained_S_all       ?
_refine_ls_restrained_S_obs       ?

#==============================================================================
# 6. SAMPLE PREPARATION DATA

# (In the unusual case where multiple samples are used in a single
#  Rietveld study, this information should be moved into the phase
#  blocks)

# The following three fields describe the preparation of the material.
# The cooling rate is in K/min.  The pressure at which the sample was
# prepared is in kPa.  The temperature of preparation is in K.

_pd_prep_cool_rate                ?
_pd_prep_pressure                 ?
_pd_prep_temperature              ?

_pd_char_colour                   colorless
data_237F50_overall

_refine_ls_shift/su_max                0.05
_refine_ls_shift/su_mean               0.01
_computing_structure_refinement        GSAS
_refine_ls_number_parameters           44
_refine_ls_goodness_of_fit_all         1.12
_refine_ls_number_restraints           19
_refine_ls_matrix_type                 full

# pointers to the phase blocks
loop_   _pd_phase_block_id
      2005-03-18T16:16|237F50_phase1|gRbTf___f:50||
# pointers to the diffraction patterns
loop_   _pd_block_diffractogram_id
      ?

# Information for phase 1
data_237F50_phase_1

_pd_block_id
  2005-03-18T16:16|237F50_phase1|gRbTf___f:50||

#==============================================================================
# 7. CHEMICAL, STRUCTURAL AND CRYSTAL DATA

_pd_char_particle_morphology      ?

_chemical_name_systematic
; 
 rubidium trifluoromethyl sulfonate
;
_chemical_name_common             'rubidium triflate'
_chemical_formula_moiety          'Rb S O3 C F3'
_chemical_formula_structural      ?
_chemical_formula_analytical      ?
_chemical_melting_point           ?
_chemical_compound_source         ?       # for minerals and
                                          # natural products
_symmetry_space_group_name_Hall   ?

_cell_measurement_temperature     '510 K'

_cell_special_details
; ?
;

_geom_special_details             ?

# The following item identifies the program(s) used (if appropriate).
_computing_structure_solution     ?

#==============================================================================

# 8. Phase information from GSAS

_pd_phase_name			       'gamma-rubidium triflate'
_cell_length_a                         5.30687(23)
_cell_length_b                         20.2424(10)
_cell_length_c                         5.94791(27)
_cell_angle_alpha                      90.0
_cell_angle_beta                       90.0
_cell_angle_gamma                      90.0
_cell_volume                           638.95(5)
_symmetry_cell_setting                 orthorhombic
_symmetry_space_group_name_H-M         "C m c m"
loop_ _symmetry_equiv_pos_site_id _symmetry_equiv_pos_as_xyz
       1 +x,+y,+z 
       2 -x,+y,+z 
       3 +x,-y,+z+1/2 
       4 -x,-y,+z+1/2 
      -1 -x,-y,-z 
      -2 +x,-y,-z 
      -3 -x,+y,-z+1/2 
      -4 +x,+y,-z+1/2 
     101 +x+1/2,+y+1/2,+z 
     102 -x+1/2,+y+1/2,+z 
     103 +x+1/2,-y+1/2,+z+1/2 
     104 -x+1/2,-y+1/2,+z+1/2 
    -101 -x+1/2,-y+1/2,-z 
    -102 +x+1/2,-y+1/2,-z 
    -103 -x+1/2,+y+1/2,-z+1/2 
    -104 +x+1/2,+y+1/2,-z+1/2 

# ATOMIC COORDINATES AND DISPLACEMENT PARAMETERS


loop_
      _atom_site_type_symbol
      _atom_site_label
      _atom_site_fract_x
      _atom_site_fract_y
      _atom_site_fract_z
      _atom_site_occupancy
      _atom_site_thermal_displace_type
      _atom_site_U_iso_or_equiv
      _atom_site_symmetry_multiplicity
Rb
Rb1     0.5          0.07191(13)  0.25002      1.0        Uani   0.14204       4
S 
S1      0.5          0.59264(15)  0.8028(19)   0.5        Uiso   0.063(5)      8
C 
C1      0.5          0.67175(20)  0.6678(16)   0.5        Uiso   0.105(5)      8
O-
O11     0.6351(17)   0.5467(5)    0.6727(28)   0.25       Uiso   0.063(5)     16
O-
O12     0.6091(16)   0.59752(32)  1.0076(24)   0.25       Uiso   0.063(5)     16
O-
O13     0.2681(21)   0.57143(29)  0.8276(25)   0.25       Uiso   0.063(5)     16
F-
F11     0.3938(18)   0.6677(4)    0.4773(19)   0.25       Uiso   0.105(5)     16
F-
F12     0.7411(23)   0.69318(34)  0.6390(18)   0.25       Uiso   0.105(5)     16
F-
F13     0.3731(15)   0.7162(4)    0.7959(28)   0.25       Uiso   0.105(5)     16

loop_ _atom_site_aniso_label
      _atom_site_aniso_U_11
      _atom_site_aniso_U_12
      _atom_site_aniso_U_13
      _atom_site_aniso_U_22
      _atom_site_aniso_U_23
      _atom_site_aniso_U_33
Rb1     0.1086(26)   0.0          0.0          0.201(4)     0.0          
0.1165(27) 

loop_ _atom_type_symbol
      _atom_type_number_in_cell
                   Rb  4.0        
                   S_  4.0        
                   C_  4.0        
                   O- 12.0        
                   F- 12.0        
 
# If you change Z, be sure to change all 3 of the following
_chemical_formula_sum                  "C1.00 F3.00 O3.00 Rb S1.00"
_chemical_formula_weight               234.53
_cell_formula_units_Z                  4

# MOLECULAR GEOMETRY

loop_
      _geom_bond_atom_site_label_1
      _geom_bond_atom_site_label_2
      _geom_bond_distance
      _geom_bond_site_symmetry_1
      _geom_bond_site_symmetry_2
      _geom_bond_publ_flag
  Rb1       Rb1            5.30687(23)  .      1_455  N
  Rb1       Rb1            5.30687(23)  .      1_655  N
  Rb1       Rb1               4.162(4)  .      3_554  N
  Rb1       Rb1               4.162(4)  .      3_555  N
  Rb1       S1                3.781(8)  .    101_444  N
  Rb1       S1                3.781(8)  .    101_544  N
  Rb1       S1                3.780(8)  .   -103_436  N
  Rb1       S1                3.780(8)  .   -103_536  N
  Rb1       O11              3.214(15)  .    101_445  N
  Rb1       O11              3.214(15)  .    102_645  N
  Rb1       O11              3.119(10)  .    103_454  N
  Rb1       O11              3.119(10)  .    104_654  N
  Rb1       O11              3.119(10)  .   -101_546  N
  Rb1       O11              3.119(10)  .   -102_346  N
  Rb1       O11              3.214(15)  .   -103_535  N
  Rb1       O11              3.214(15)  .   -104_335  N
  Rb1       O12              2.579(12)  .    101_444  N
  Rb1       O12               3.577(8)  .    101_544  N
  Rb1       O12               3.577(8)  .    102_544  N
  Rb1       O12              2.579(12)  .    102_644  N
  Rb1       O12               3.577(8)  .   -103_436  N
  Rb1       O12              2.579(12)  .   -103_536  N
  Rb1       O12              2.579(12)  .   -104_336  N
  Rb1       O12               3.577(8)  .   -104_436  N
  Rb1       O13              2.888(15)  .    101_544  N
  Rb1       O13              3.718(14)  .    101_545  N
  Rb1       O13              2.888(15)  .    102_544  N
  Rb1       O13              3.718(14)  .    102_545  N
  Rb1       O13               3.264(8)  .    103_554  N
  Rb1       O13               3.264(8)  .    104_554  N
  Rb1       O13               3.264(8)  .   -101_446  N
  Rb1       O13               3.264(8)  .   -102_446  N
  Rb1       O13              3.718(14)  .   -103_435  N
  Rb1       O13              2.887(15)  .   -103_436  N
  Rb1       O13              3.718(14)  .   -104_435  N
  Rb1       O13              2.887(15)  .   -104_436  N
  Rb1       F11              3.992(10)  .    101_445  N
  Rb1       F11               3.154(9)  .    101_545  N
  Rb1       F11               3.154(9)  .    102_545  N
  Rb1       F11              3.992(10)  .    102_645  N
  Rb1       F11               3.155(9)  .   -103_435  N
  Rb1       F11              3.992(10)  .   -103_535  N
  Rb1       F11              3.992(10)  .   -104_335  N
  Rb1       F11               3.155(9)  .   -104_435  N
  Rb1       F12              3.642(10)  .    101_445  N
  Rb1       F12              3.642(10)  .    102_645  N
  Rb1       F12              3.642(10)  .   -103_535  N
  Rb1       F12              3.642(10)  .   -104_335  N
  S1        Rb1               3.781(8)  .    101_456  N
  S1        Rb1               3.781(8)  .    101_556  N
  S1        S1               0.628(23)  .     -3_656  N
  S1        C1                1.791(7)  .      1_555  N
  S1        C1                1.611(5)  .     -3_656  N
  S1        O11              1.406(12)  .      1_555  N
  S1        O11              1.406(12)  .      2_655  N
  S1        O11              1.183(12)  .     -3_656  N
  S1        O11              1.183(12)  .     -4_556  N
  S1        O12              1.353(13)  .      1_555  N
  S1        O12              1.353(13)  .      2_655  N
  S1        O12              1.937(22)  .     -3_656  N
  S1        O12              1.937(22)  .     -4_556  N
  S1        O13              1.312(12)  .      1_555  N
  S1        O13              1.312(12)  .      2_655  N
  S1        O13              1.517(16)  .     -3_656  N
  S1        O13              1.517(16)  .     -4_556  N
  S1        F11              2.524(10)  .      1_555  N
  S1        F11              2.524(10)  .      2_655  N
  S1        F11              2.082(15)  .     -3_656  N
  S1        F11              2.082(15)  .     -4_556  N
  S1        F12              2.594(11)  .      1_555  N
  S1        F12              2.594(11)  .      2_655  N
  S1        F12              2.429(10)  .     -3_656  N
  S1        F12              2.429(10)  .     -4_556  N
  S1        F13               2.590(9)  .      1_555  N
  S1        F13               2.590(9)  .      2_655  N
  S1        F13              2.655(12)  .     -3_656  N
  S1        F13              2.655(12)  .     -4_556  N
  C1        S1                1.791(7)  .      1_555  N
  C1        S1                1.611(5)  .     -3_656  N
  C1        C1               0.978(19)  .     -3_656  N
  C1        O12              1.919(13)  .     -3_656  N
  C1        O12              1.919(13)  .     -4_556  N
  C1        F11              1.268(13)  .      1_555  N
  C1        F11              1.268(13)  .      2_655  N
  C1        F11              2.187(18)  .     -3_656  N
  C1        F11              2.187(18)  .     -4_556  N
  C1        F12              1.362(13)  .      1_555  N
  C1        F12              1.362(13)  .      2_655  N
  C1        F12              1.774(16)  .     -3_656  N
  C1        F12              1.774(16)  .     -4_556  N
  C1        F13              1.358(12)  .      1_555  N
  C1        F13              1.358(12)  .      2_655  N
  C1        F13              1.144(10)  .     -3_656  N
  C1        F13              1.144(10)  .     -4_556  N
  O11       Rb1              3.214(15)  .    101_555  N
  O11       Rb1              3.119(10)  .    103_555  N
  O11       S1               1.406(12)  .      1_555  N
  O11       S1               1.183(12)  .     -3_656  N
  O11       O11              1.434(18)  .      2_655  N
  O11       O11              1.703(26)  .     -3_656  N
  O11       O11              0.920(33)  .     -4_556  N
  O11       O12              1.971(18)  .     -3_656  N
  O11       O12              1.492(23)  .     -4_556  N
  O11       O13              1.167(16)  .      2_655  N
  O11       O13              0.717(13)  .     -3_656  N
  O11       O13              2.011(11)  .     -4_556  N
  O12       Rb1               3.577(8)  .    101_456  N
  O12       Rb1              2.579(12)  .    101_556  N
  O12       S1               1.353(13)  .      1_555  N
  O12       S1               1.937(22)  .     -3_656  N
  O12       C1               1.919(13)  .     -3_656  N
  O12       O11              1.971(18)  .     -3_656  N
  O12       O11              1.492(23)  .     -4_556  N
  O12       O12              1.158(17)  .      2_655  N
  O12       O13              2.168(13)  .      1_555  N
  O12       O13              1.360(14)  .      2_655  N
  O12       O13              2.163(23)  .     -3_656  N
  O12       F11              1.423(13)  .     -3_656  N
  O12       F11              1.825(14)  .     -4_556  N
  O12       F12              2.236(13)  .     -4_556  N
  O13       Rb1              3.718(14)  .    101_455  N
  O13       Rb1              2.888(15)  .    101_456  N
  O13       Rb1               3.264(8)  .    103_455  N
  O13       S1               1.312(12)  .      1_555  N
  O13       S1               1.517(16)  .     -3_656  N
  O13       O11              1.167(16)  .      2_655  N
  O13       O11              0.717(13)  .     -3_656  N
  O13       O11              2.011(11)  .     -4_556  N
  O13       O12              2.168(13)  .      1_555  N
  O13       O12              1.360(14)  .      2_655  N
  O13       O12              2.163(23)  .     -3_656  N
  O13       O13              0.923(30)  .     -4_556  N
  O13       F11              2.363(16)  .     -4_556  N
  F11       Rb1               3.154(9)  .    101_455  N
  F11       Rb1              3.992(10)  .    101_555  N
  F11       S1               2.524(10)  .      1_555  N
  F11       S1               2.082(15)  .     -3_656  N
  F11       C1               1.268(13)  .      1_555  N
  F11       C1               2.187(18)  .     -3_656  N
  F11       O12              1.423(13)  .     -3_656  N
  F11       O12              1.825(14)  .     -4_556  N
  F11       O13              2.363(16)  .     -4_556  N
  F11       F11              1.127(19)  .      2_655  N
  F11       F12              2.142(14)  .      1_555  N
  F11       F12              1.305(13)  .      2_655  N
  F11       F12              2.447(17)  .     -3_656  N
  F11       F13              2.137(15)  .      1_555  N
  F11       F13              2.467(17)  .      2_655  N
  F11       F13              2.077(16)  .     -3_656  N
  F11       F13              1.672(20)  .     -4_556  N
  F12       Rb1              3.642(10)  .    101_555  N
  F12       S1               2.594(11)  .      1_555  N
  F12       S1               2.429(10)  .     -3_656  N
  F12       C1               1.362(13)  .      1_555  N
  F12       C1               1.774(16)  .     -3_656  N
  F12       O12              2.236(13)  .     -4_556  N
  F12       F11              2.142(14)  .      1_555  N
  F12       F11              1.305(13)  .      2_655  N
  F12       F11              2.447(17)  .     -3_656  N
  F12       F12              2.559(24)  .      2_655  N
  F12       F12              1.321(22)  .     -4_556  N
  F12       F13              2.214(13)  .      1_555  N
  F12       F13              1.206(17)  .      2_655  N
  F12       F13              0.857(15)  .     -3_656  N
  F12       F13              2.045(12)  .     -4_556  N
  F13       S1                2.590(9)  .      1_555  N
  F13       S1               2.655(12)  .     -3_656  N
  F13       C1               1.358(12)  .      1_555  N
  F13       C1               1.144(10)  .     -3_656  N
  F13       F11              2.137(15)  .      1_555  N
  F13       F11              2.467(17)  .      2_655  N
  F13       F11              2.077(16)  .     -3_656  N
  F13       F11              1.672(20)  .     -4_556  N
  F13       F12              2.214(13)  .      1_555  N
  F13       F12              1.206(17)  .      2_655  N
  F13       F12              0.857(15)  .     -3_656  N
  F13       F12              2.045(12)  .     -4_556  N
  F13       F13              1.347(16)  .      2_655  N
  F13       F13              1.454(19)  .     -3_656  N
  F13       F13              0.546(33)  .     -4_556  N

loop_
      _geom_angle_atom_site_label_1
      _geom_angle_atom_site_label_2
      _geom_angle_atom_site_label_3
      _geom_angle
      _geom_angle_site_symmetry_1
      _geom_angle_site_symmetry_2
      _geom_angle_site_symmetry_3
      _geom_angle_publ_flag
  Rb1       Rb1       Rb1              91.22(10)      3_554  .      3_555  N
  Rb1       Rb1       S1                64.84(8)      3_554  .    101_444  N
  Rb1       Rb1       S1                64.84(8)      3_554  .    101_544  N
  Rb1       Rb1       S1              125.48(11)      3_554  .   -103_546  N
  Rb1       Rb1       S1              125.48(11)      3_554  .   -103_646  N
  Rb1       Rb1       O11             116.62(20)      3_554  .    101_445  N
  Rb1       Rb1       O11             116.62(20)      3_554  .    102_645  N
  Rb1       Rb1       O11              49.91(28)      3_554  .    103_454  N
  Rb1       Rb1       O11              49.91(28)      3_554  .    104_654  N
  Rb1       Rb1       O11              64.32(27)      3_554  .   -101_546  N
  Rb1       Rb1       O11              64.32(27)      3_554  .   -102_346  N
  Rb1       Rb1       O11              47.94(19)      3_554  .   -103_536  N
  Rb1       Rb1       O11              47.94(19)      3_554  .   -104_336  N
  Rb1       Rb1       O12              75.00(23)      3_554  .    101_444  N
  Rb1       Rb1       O12              75.00(23)      3_554  .    102_644  N
  Rb1       Rb1       O12             122.69(18)      3_554  .   -103_536  N
  Rb1       Rb1       O12             122.69(18)      3_554  .   -104_336  N
  Rb1       Rb1       O13              51.38(18)      3_554  .    101_544  N
  Rb1       Rb1       O13              51.38(18)      3_554  .    102_544  N
  Rb1       Rb1       O13              58.61(24)      3_554  .    103_554  N
  Rb1       Rb1       O13              58.61(24)      3_554  .    104_554  N
  Rb1       Rb1       O13              43.71(27)      3_554  .   -101_445  N
  Rb1       Rb1       O13              43.71(27)      3_554  .   -102_445  N
  Rb1       Rb1       O13             128.28(16)      3_554  .   -103_436  N
  Rb1       Rb1       S1              125.48(11)      3_555  .    101_444  N
  Rb1       Rb1       S1              125.48(11)      3_555  .    101_544  N
  Rb1       Rb1       S1                64.84(8)      3_555  .   -103_546  N
  Rb1       Rb1       S1                64.84(8)      3_555  .   -103_646  N
  Rb1       Rb1       O11              47.95(19)      3_555  .    101_445  N
  Rb1       Rb1       O11              47.95(19)      3_555  .    102_645  N
  Rb1       Rb1       O11              64.33(27)      3_555  .    103_454  N
  Rb1       Rb1       O11              64.33(27)      3_555  .    104_654  N
  Rb1       Rb1       O11              49.92(28)      3_555  .   -101_546  N
  Rb1       Rb1       O11              49.92(28)      3_555  .   -102_346  N
  Rb1       Rb1       O11             116.62(20)      3_555  .   -103_536  N
  Rb1       Rb1       O11             116.62(20)      3_555  .   -104_336  N
  Rb1       Rb1       O12             122.69(18)      3_555  .    101_444  N
  Rb1       Rb1       O12             122.69(18)      3_555  .    102_644  N
  Rb1       Rb1       O12              75.00(23)      3_555  .   -103_536  N
  Rb1       Rb1       O12              75.00(23)      3_555  .   -104_336  N
  Rb1       Rb1       O13             128.28(16)      3_555  .    101_544  N
  Rb1       Rb1       O13             128.28(16)      3_555  .    102_544  N
  Rb1       Rb1       O13              43.72(27)      3_555  .    103_554  N
  Rb1       Rb1       O13              43.72(27)      3_555  .    104_554  N
  Rb1       Rb1       O13              58.62(24)      3_555  .   -101_445  N
  Rb1       Rb1       O13              58.62(24)      3_555  .   -102_445  N
  Rb1       Rb1       O13              51.38(18)      3_555  .   -103_436  N
  S1        Rb1       S1               89.15(24)    101_444  .    101_544  N
  S1        Rb1       S1               89.44(24)    101_444  .   -103_546  N
  S1        Rb1       S1              167.25(14)    101_444  .   -103_646  N
  S1        Rb1       O11              98.34(13)    101_444  .    101_445  N
  S1        Rb1       O11             172.24(30)    101_444  .    102_645  N
  S1        Rb1       O11              63.00(20)    101_444  .    103_454  N
  S1        Rb1       O11             114.67(35)    101_444  .    104_654  N
  S1        Rb1       O11             128.67(23)    101_444  .   -101_546  N
  S1        Rb1       O11              75.73(33)    101_444  .   -102_346  N
  S1        Rb1       O11              83.69(14)    101_444  .   -103_536  N
  S1        Rb1       O11              17.13(22)    101_444  .   -104_336  N
  S1        Rb1       O12              11.41(21)    101_444  .    101_444  N
  S1        Rb1       O12              98.56(33)    101_444  .    102_644  N
  S1        Rb1       O12             159.33(22)    101_444  .   -103_536  N
  S1        Rb1       O12              78.84(35)    101_444  .   -104_336  N
  S1        Rb1       O13              74.57(31)    101_444  .    101_544  N
  S1        Rb1       O13              16.72(19)    101_444  .    102_544  N
  S1        Rb1       O13             120.26(24)    101_444  .    103_554  N
  S1        Rb1       O13              83.81(23)    101_444  .    104_554  N
  S1        Rb1       O13              72.14(22)    101_444  .   -101_445  N
  S1        Rb1       O13             107.76(22)    101_444  .   -102_445  N
  S1        Rb1       O13             105.47(32)    101_444  .   -103_436  N
  S1        Rb1       S1              167.25(14)    101_544  .   -103_546  N
  S1        Rb1       S1               89.44(24)    101_544  .   -103_646  N
  S1        Rb1       O11             172.24(30)    101_544  .    101_445  N
  S1        Rb1       O11              98.34(13)    101_544  .    102_645  N
  S1        Rb1       O11             114.67(35)    101_544  .    103_454  N
  S1        Rb1       O11              63.00(20)    101_544  .    104_654  N
  S1        Rb1       O11              75.73(33)    101_544  .   -101_546  N
  S1        Rb1       O11             128.67(23)    101_544  .   -102_346  N
  S1        Rb1       O11              17.13(22)    101_544  .   -103_536  N
  S1        Rb1       O11              83.69(14)    101_544  .   -104_336  N
  S1        Rb1       O12              98.56(33)    101_544  .    101_444  N
  S1        Rb1       O12              11.41(21)    101_544  .    102_644  N
  S1        Rb1       O12              78.84(35)    101_544  .   -103_536  N
  S1        Rb1       O12             159.33(22)    101_544  .   -104_336  N
  S1        Rb1       O13              16.72(19)    101_544  .    101_544  N
  S1        Rb1       O13              74.57(31)    101_544  .    102_544  N
  S1        Rb1       O13              83.81(23)    101_544  .    103_554  N
  S1        Rb1       O13             120.26(24)    101_544  .    104_554  N
  S1        Rb1       O13             107.76(22)    101_544  .   -101_445  N
  S1        Rb1       O13              72.14(22)    101_544  .   -102_445  N
  S1        Rb1       O13             163.43(16)    101_544  .   -103_436  N
  S1        Rb1       S1               89.16(24)   -103_546  .   -103_646  N
  S1        Rb1       O11              17.13(22)   -103_437  .    101_445  N
  S1        Rb1       O11              83.69(14)   -103_437  .    102_645  N
  S1        Rb1       O11              75.73(33)   -103_437  .    103_454  N
  S1        Rb1       O11             128.68(23)   -103_437  .    104_654  N
  S1        Rb1       O11             114.68(35)   -103_437  .   -101_546  N
  S1        Rb1       O11              63.00(20)   -103_437  .   -102_346  N
  S1        Rb1       O11             172.24(30)   -103_437  .   -103_536  N
  S1        Rb1       O11              98.34(13)   -103_437  .   -104_336  N
  S1        Rb1       O12              78.84(35)   -103_436  .    101_444  N
  S1        Rb1       O12             159.33(22)   -103_436  .    102_644  N
  S1        Rb1       O12              98.57(33)   -103_436  .   -103_536  N
  S1        Rb1       O12              11.41(21)   -103_436  .   -104_336  N
  S1        Rb1       O13             163.43(16)   -103_436  .    101_544  N
  S1        Rb1       O13             105.47(32)   -103_436  .    102_544  N
  S1        Rb1       O13             107.77(22)   -103_436  .    103_554  N
  S1        Rb1       O13              72.14(22)   -103_436  .    104_554  N
  S1        Rb1       O13              83.81(23)   -103_436  .   -101_445  N
  S1        Rb1       O13             120.27(24)   -103_436  .   -102_445  N
  S1        Rb1       O13              16.72(19)   -103_436  .   -103_436  N
  S1        Rb1       O11              83.69(14)   -103_537  .    101_445  N
  S1        Rb1       O11              17.13(22)   -103_537  .    102_645  N
  S1        Rb1       O11             128.68(23)   -103_537  .    103_454  N
  S1        Rb1       O11              75.73(33)   -103_537  .    104_654  N
  S1        Rb1       O11              63.00(20)   -103_537  .   -101_546  N
  S1        Rb1       O11             114.68(35)   -103_537  .   -102_346  N
  S1        Rb1       O11              98.34(13)   -103_537  .   -103_536  N
  S1        Rb1       O11             172.24(30)   -103_537  .   -104_336  N
  S1        Rb1       O12             159.33(22)   -103_536  .    101_444  N
  S1        Rb1       O12              78.84(35)   -103_536  .    102_644  N
  S1        Rb1       O12              11.41(21)   -103_536  .   -103_536  N
  S1        Rb1       O12              98.57(33)   -103_536  .   -104_336  N
  S1        Rb1       O13             105.47(32)   -103_536  .    101_544  N
  S1        Rb1       O13             163.43(16)   -103_536  .    102_544  N
  S1        Rb1       O13              72.14(22)   -103_536  .    103_554  N
  S1        Rb1       O13             107.77(22)   -103_536  .    104_554  N
  S1        Rb1       O13             120.27(24)   -103_536  .   -101_445  N
  S1        Rb1       O13              83.81(23)   -103_536  .   -102_445  N
  S1        Rb1       O13              74.57(31)   -103_536  .   -103_436  N
  O11       Rb1       O11                74.1(4)    101_445  .    102_645  N
  O11       Rb1       O11              67.62(23)    101_445  .    103_454  N
  O11       Rb1       O11             111.55(32)    101_445  .    104_654  N
  O11       Rb1       O11              97.86(31)    101_445  .   -101_546  N
  O11       Rb1       O11                52.3(4)    101_445  .   -102_346  N
  O11       Rb1       O11               161.8(4)    101_445  .   -103_536  N
  O11       Rb1       O11               102.9(4)    101_445  .   -104_336  N
  O11       Rb1       O12              89.11(18)    101_445  .    101_444  N
  O11       Rb1       O12               162.5(4)    101_445  .    102_644  N
  O11       Rb1       O12              94.55(17)    101_445  .   -103_536  N
  O11       Rb1       O12                27.1(4)    101_445  .   -104_336  N
  O11       Rb1       O13             167.69(28)    101_445  .    101_544  N
  O11       Rb1       O13             112.54(21)    101_445  .    102_544  N
  O11       Rb1       O13              90.64(35)    101_445  .    103_554  N
  O11       Rb1       O13              59.07(28)    101_445  .    104_554  N
  O11       Rb1       O13              72.97(32)    101_445  .   -101_445  N
  O11       Rb1       O13             103.43(24)    101_445  .   -102_445  N
  O11       Rb1       O13              12.02(28)    101_445  .   -103_436  N
  O11       Rb1       O11             111.55(32)    102_645  .    103_454  N
  O11       Rb1       O11              67.62(23)    102_645  .    104_654  N
  O11       Rb1       O11                52.3(4)    102_645  .   -101_546  N
  O11       Rb1       O11              97.86(31)    102_645  .   -102_346  N
  O11       Rb1       O11               102.9(4)    102_645  .   -103_536  N
  O11       Rb1       O11               161.8(4)    102_645  .   -104_336  N
  O11       Rb1       O12               162.5(4)    102_645  .    101_444  N
  O11       Rb1       O12              89.11(18)    102_645  .    102_644  N
  O11       Rb1       O12                27.1(4)    102_645  .   -103_536  N
  O11       Rb1       O12              94.55(17)    102_645  .   -104_336  N
  O11       Rb1       O13             112.54(21)    102_645  .    101_544  N
  O11       Rb1       O13             167.69(28)    102_645  .    102_544  N
  O11       Rb1       O13              59.07(28)    102_645  .    103_554  N
  O11       Rb1       O13              90.64(35)    102_645  .    104_554  N
  O11       Rb1       O13             103.43(24)    102_645  .   -101_445  N
  O11       Rb1       O13              72.97(32)    102_645  .   -102_445  N
  O11       Rb1       O13              67.40(24)    102_645  .   -103_436  N
  O11       Rb1       O11              76.75(30)    103_454  .    104_654  N
  O11       Rb1       O11              79.30(28)    103_454  .   -101_546  N
  O11       Rb1       O11                17.0(6)    103_454  .   -102_346  N
  O11       Rb1       O11              97.86(31)    103_454  .   -103_536  N
  O11       Rb1       O11                52.3(4)    103_454  .   -104_336  N
  O11       Rb1       O12              64.72(23)    103_454  .    101_444  N
  O11       Rb1       O12               124.9(4)    103_454  .    102_644  N
  O11       Rb1       O12             137.44(22)    103_454  .   -103_536  N
  O11       Rb1       O12              74.80(26)    103_454  .   -104_336  N
  O11       Rb1       O13               100.1(4)    103_454  .    101_544  N
  O11       Rb1       O13              64.10(22)    103_454  .    102_544  N
  O11       Rb1       O13              66.86(19)    103_454  .    103_554  N
  O11       Rb1       O13              20.91(29)    103_454  .    104_554  N
  O11       Rb1       O13              12.63(24)    103_454  .   -101_445  N
  O11       Rb1       O13              64.24(19)    103_454  .   -102_445  N
  O11       Rb1       O13                79.6(4)    103_454  .   -103_436  N
  O11       Rb1       O11                17.0(6)    104_654  .   -101_546  N
  O11       Rb1       O11              79.30(28)    104_654  .   -102_346  N
  O11       Rb1       O11                52.3(4)    104_654  .   -103_536  N
  O11       Rb1       O11              97.86(31)    104_654  .   -104_336  N
  O11       Rb1       O12               124.9(4)    104_654  .    101_444  N
  O11       Rb1       O12              64.72(23)    104_654  .    102_644  N
  O11       Rb1       O12              74.80(26)    104_654  .   -103_536  N
  O11       Rb1       O12             137.44(22)    104_654  .   -104_336  N
  O11       Rb1       O13              64.10(22)    104_654  .    101_544  N
  O11       Rb1       O13               100.1(4)    104_654  .    102_544  N
  O11       Rb1       O13              20.91(29)    104_654  .    103_554  N
  O11       Rb1       O13              66.86(19)    104_654  .    104_554  N
  O11       Rb1       O13              64.24(19)    104_654  .   -101_445  N
  O11       Rb1       O13              12.63(24)    104_654  .   -102_445  N
  O11       Rb1       O13             115.57(33)    104_654  .   -103_436  N
  O11       Rb1       O11              76.75(30)   -101_546  .   -102_346  N
  O11       Rb1       O11              67.62(23)   -101_546  .   -103_536  N
  O11       Rb1       O11             111.55(32)   -101_546  .   -104_336  N
  O11       Rb1       O12             137.44(22)   -101_545  .    101_444  N
  O11       Rb1       O12              74.80(26)   -101_545  .    102_644  N
  O11       Rb1       O12              64.72(23)   -101_545  .   -103_536  N
  O11       Rb1       O12               124.9(4)   -101_545  .   -104_336  N
  O11       Rb1       O13                79.6(4)   -101_545  .    101_544  N
  O11       Rb1       O13             115.57(33)   -101_545  .    102_544  N
  O11       Rb1       O13              12.63(24)   -101_545  .    103_554  N
  O11       Rb1       O13              64.24(19)   -101_545  .    104_554  N
  O11       Rb1       O13              66.86(19)   -101_545  .   -101_445  N
  O11       Rb1       O13              20.91(29)   -101_545  .   -102_445  N
  O11       Rb1       O13               100.1(4)   -101_545  .   -103_436  N
  O11       Rb1       O11             111.55(32)   -102_346  .   -103_536  N
  O11       Rb1       O11              67.62(23)   -102_346  .   -104_336  N
  O11       Rb1       O12              74.80(26)   -102_345  .    101_444  N
  O11       Rb1       O12             137.44(22)   -102_345  .    102_644  N
  O11       Rb1       O12               124.9(4)   -102_345  .   -103_536  N
  O11       Rb1       O12              64.72(23)   -102_345  .   -104_336  N
  O11       Rb1       O13             115.57(33)   -102_345  .    101_544  N
  O11       Rb1       O13                79.6(4)   -102_345  .    102_544  N
  O11       Rb1       O13              64.24(19)   -102_345  .    103_554  N
  O11       Rb1       O13              12.63(24)   -102_345  .    104_554  N
  O11       Rb1       O13              20.91(29)   -102_345  .   -101_445  N
  O11       Rb1       O13              66.86(19)   -102_345  .   -102_445  N
  O11       Rb1       O13              64.11(22)   -102_345  .   -103_436  N
  O11       Rb1       O11                74.1(4)   -103_536  .   -104_336  N
  O11       Rb1       O12              94.54(17)   -103_535  .    101_444  N
  O11       Rb1       O12                27.1(4)   -103_535  .    102_644  N
  O11       Rb1       O12              89.11(18)   -103_535  .   -103_536  N
  O11       Rb1       O12               162.5(4)   -103_535  .   -104_336  N
  O11       Rb1       O13              12.02(28)   -103_535  .    101_544  N
  O11       Rb1       O13              67.40(24)   -103_535  .    102_544  N
  O11       Rb1       O13              72.97(32)   -103_535  .    103_554  N
  O11       Rb1       O13             103.43(24)   -103_535  .    104_554  N
  O11       Rb1       O13              90.64(35)   -103_535  .   -101_445  N
  O11       Rb1       O13              59.07(28)   -103_535  .   -102_445  N
  O11       Rb1       O13             167.69(28)   -103_535  .   -103_436  N
  O11       Rb1       O12                27.1(4)   -104_335  .    101_444  N
  O11       Rb1       O12              94.54(17)   -104_335  .    102_644  N
  O11       Rb1       O12               162.5(4)   -104_335  .   -103_536  N
  O11       Rb1       O12              89.11(18)   -104_335  .   -104_336  N
  O11       Rb1       O13              67.40(24)   -104_335  .    101_544  N
  O11       Rb1       O13              12.02(28)   -104_335  .    102_544  N
  O11       Rb1       O13             103.43(24)   -104_335  .    103_554  N
  O11       Rb1       O13              72.97(32)   -104_335  .    104_554  N
  O11       Rb1       O13              59.07(28)   -104_335  .   -101_445  N
  O11       Rb1       O13              90.64(35)   -104_335  .   -102_445  N
  O11       Rb1       O13             112.54(21)   -104_335  .   -103_436  N
  O12       Rb1       O12               107.1(5)    101_444  .    102_644  N
  O12       Rb1       O12             156.81(34)    101_444  .   -103_536  N
  O12       Rb1       O12                68.0(5)    101_444  .   -104_336  N
  O12       Rb1       O13                84.9(4)    101_444  .    101_544  N
  O12       Rb1       O13              28.10(28)    101_444  .    102_544  N
  O12       Rb1       O13             127.46(32)    101_444  .    103_554  N
  O12       Rb1       O13              84.67(32)    101_444  .    104_554  N
  O12       Rb1       O13              75.47(19)    101_444  .   -101_445  N
  O12       Rb1       O13             116.76(27)    101_444  .   -102_445  N
  O12       Rb1       O13                95.2(4)    101_444  .   -103_436  N
  O12       Rb1       O12                68.0(5)    102_644  .   -103_536  N
  O12       Rb1       O12             156.81(34)    102_644  .   -104_336  N
  O12       Rb1       O13              28.10(28)    102_644  .    101_544  N
  O12       Rb1       O13                84.9(4)    102_644  .    102_544  N
  O12       Rb1       O13              84.67(32)    102_644  .    103_554  N
  O12       Rb1       O13             127.46(32)    102_644  .    104_554  N
  O12       Rb1       O13             116.76(27)    102_644  .   -101_445  N
  O12       Rb1       O13              75.47(19)    102_644  .   -102_445  N
  O12       Rb1       O13             152.07(24)    102_644  .   -103_436  N
  O12       Rb1       O12               107.1(5)   -103_536  .   -104_336  N
  O12       Rb1       O13                95.2(4)   -103_536  .    101_544  N
  O12       Rb1       O13             152.06(24)   -103_536  .    102_544  N
  O12       Rb1       O13              75.47(19)   -103_536  .    103_554  N
  O12       Rb1       O13             116.76(27)   -103_536  .    104_554  N
  O12       Rb1       O13             127.47(32)   -103_536  .   -101_445  N
  O12       Rb1       O13              84.67(32)   -103_536  .   -102_445  N
  O12       Rb1       O13                84.9(4)   -103_536  .   -103_436  N
  O12       Rb1       O13             152.06(24)   -104_336  .    101_544  N
  O12       Rb1       O13                95.2(4)   -104_336  .    102_544  N
  O12       Rb1       O13             116.76(27)   -104_336  .    103_554  N
  O12       Rb1       O13              75.47(19)   -104_336  .    104_554  N
  O12       Rb1       O13              84.67(32)   -104_336  .   -101_445  N
  O12       Rb1       O13             127.47(32)   -104_336  .   -102_445  N
  O12       Rb1       O13              28.10(28)   -104_336  .   -103_436  N
  O13       Rb1       O13                59.0(5)    101_544  .    102_544  N
  O13       Rb1       O13              84.56(28)    101_544  .    103_554  N
  O13       Rb1       O13             109.56(34)    101_544  .    104_554  N
  O13       Rb1       O13              95.09(30)    101_544  .   -101_445  N
  O13       Rb1       O13              70.08(29)    101_544  .   -102_445  N
  O13       Rb1       O13           179.6174(19)    101_544  .   -103_436  N
  O13       Rb1       O13             109.56(34)    102_544  .    103_554  N
  O13       Rb1       O13              84.56(28)    102_544  .    104_554  N
  O13       Rb1       O13              70.08(29)    102_544  .   -101_445  N
  O13       Rb1       O13              95.09(30)    102_544  .   -102_445  N
  O13       Rb1       O13               121.0(5)    102_544  .   -103_436  N
  O13       Rb1       O13              51.68(34)    103_554  .    104_554  N
  O13       Rb1       O13              54.54(32)    103_554  .   -101_445  N
  O13       Rb1       O13                16.3(5)    103_554  .   -102_445  N
  O13       Rb1       O13              95.10(30)    103_554  .   -103_436  N
  O13       Rb1       O13                16.3(5)    104_554  .   -101_445  N
  O13       Rb1       O13              54.54(32)    104_554  .   -102_445  N
  O13       Rb1       O13              70.08(29)    104_554  .   -103_436  N
  O13       Rb1       O13              51.68(34)   -101_445  .   -102_445  N
  O13       Rb1       O13              84.57(28)   -101_445  .   -103_436  N
  O13       Rb1       O13             109.56(34)   -102_445  .   -103_436  N
  Rb1       S1        Rb1              89.15(24)    101_456  .    101_556  N
  Rb1       S1        S1              134.72(12)    101_456  .     -3_656  N
  Rb1       S1        C1              114.50(17)    101_456  .      1_555  N
  Rb1       S1        C1                 91.9(5)    101_456  .     -3_547  N
  Rb1       S1        O11             132.21(30)    101_456  .      1_555  N
  Rb1       S1        O11              87.48(33)    101_456  .      2_655  N
  Rb1       S1        O11               53.2(10)    101_456  .     -3_547  N
  Rb1       S1        O11              104.6(11)    101_456  .     -4_447  N
  Rb1       S1        O12                71.0(4)    101_456  .      1_555  N
  Rb1       S1        O12              22.15(34)    101_456  .      2_655  N
  Rb1       S1        O12             117.80(24)    101_456  .     -3_546  N
  Rb1       S1        O12               152.4(4)    101_456  .     -4_446  N
  Rb1       S1        O13                39.3(4)    101_456  .      1_555  N
  Rb1       S1        O13             122.89(26)    101_456  .      2_655  N
  Rb1       S1        O13               153.9(7)    101_456  .     -3_546  N
  Rb1       S1        O13                76.0(7)    101_456  .     -4_446  N
  Rb1       S1        F11                80.1(4)    101_456  .     -3_657  N
  Rb1       S1        F11              56.55(32)    101_456  .     -4_557  N
  Rb1       S1        S1              134.72(12)    101_556  .     -3_656  N
  Rb1       S1        C1              114.50(17)    101_556  .      1_555  N
  Rb1       S1        C1                 91.9(5)    101_556  .     -3_547  N
  Rb1       S1        O11              87.48(33)    101_556  .      1_555  N
  Rb1       S1        O11             132.21(30)    101_556  .      2_655  N
  Rb1       S1        O11              104.6(11)    101_556  .     -3_547  N
  Rb1       S1        O11               53.2(10)    101_556  .     -4_447  N
  Rb1       S1        O12              22.15(34)    101_556  .      1_555  N
  Rb1       S1        O12                71.0(4)    101_556  .      2_655  N
  Rb1       S1        O12               152.4(4)    101_556  .     -3_546  N
  Rb1       S1        O12             117.80(24)    101_556  .     -4_446  N
  Rb1       S1        O13             122.89(26)    101_556  .      1_555  N
  Rb1       S1        O13                39.3(4)    101_556  .      2_655  N
  Rb1       S1        O13                76.0(7)    101_556  .     -3_546  N
  Rb1       S1        O13               153.9(7)    101_556  .     -4_446  N
  Rb1       S1        F11              56.55(32)    101_556  .     -3_657  N
  Rb1       S1        F11                80.1(4)    101_556  .     -4_557  N
  S1        S1        C1               63.37(29)     -3_547  .      1_555  N
  S1        S1        C1                 96.2(6)     -3_547  .     -3_547  N
  S1        S1        O11              56.60(28)     -3_547  .      1_555  N
  S1        S1        O11              56.60(28)     -3_547  .      2_655  N
  S1        S1        O11               97.1(13)     -3_547  .     -3_547  N
  S1        S1        O11               97.1(13)     -3_547  .     -4_447  N
  S1        S1        O12             154.26(32)     -3_546  .      1_555  N
  S1        S1        O12             154.26(32)     -3_546  .      2_655  N
  S1        S1        O12              17.65(29)     -3_546  .     -3_546  N
  S1        S1        O12              17.65(29)     -3_546  .     -4_446  N
  S1        S1        O13              96.46(33)     -3_546  .      1_555  N
  S1        S1        O13              96.46(33)     -3_546  .      2_655  N
  S1        S1        O13                59.3(9)     -3_546  .     -3_546  N
  S1        S1        O13                59.3(9)     -3_546  .     -4_446  N
  S1        S1        F11               128.9(4)     -3_657  .     -3_657  N
  S1        S1        F11               128.9(4)     -3_657  .     -4_557  N
  C1        S1        C1                 32.9(7)      1_555  .     -3_547  N
  C1        S1        O11             110.13(14)      1_555  .      1_555  N
  C1        S1        O11             110.13(14)      1_555  .      2_655  N
  C1        S1        O11               139.3(8)      1_555  .     -3_547  N
  C1        S1        O11               139.3(8)      1_555  .     -4_447  N
  C1        S1        O12             109.79(14)      1_555  .      1_555  N
  C1        S1        O12             109.79(14)      1_555  .      2_655  N
  C1        S1        O12                61.8(4)      1_555  .     -3_546  N
  C1        S1        O12                61.8(4)      1_555  .     -4_446  N
  C1        S1        O13             110.06(14)      1_555  .      1_555  N
  C1        S1        O13             110.06(14)      1_555  .      2_655  N
  C1        S1        O13                91.4(6)      1_555  .     -3_546  N
  C1        S1        O13                91.4(6)      1_555  .     -4_446  N
  C1        S1        F11                68.3(4)      1_555  .     -3_657  N
  C1        S1        F11                68.3(4)      1_555  .     -4_557  N
  C1        S1        O11               135.8(5)     -3_547  .      1_555  N
  C1        S1        O11               135.8(5)     -3_547  .      2_655  N
  C1        S1        O11               140.1(7)     -3_547  .     -3_547  N
  C1        S1        O11               140.1(7)     -3_547  .     -4_447  N
  C1        S1        O12                80.2(6)     -3_546  .      1_555  N
  C1        S1        O12                80.2(6)     -3_546  .      2_655  N
  C1        S1        O12                93.0(6)     -3_546  .     -3_546  N
  C1        S1        O12                93.0(6)     -3_546  .     -4_446  N
  C1        S1        O13             108.25(25)     -3_546  .      1_555  N
  C1        S1        O13             108.25(25)     -3_546  .      2_655  N
  C1        S1        O13               109.7(4)     -3_546  .     -3_546  N
  C1        S1        O13               109.7(4)     -3_546  .     -4_446  N
  C1        S1        F11                37.5(4)     -3_657  .     -3_657  N
  C1        S1        F11                37.5(4)     -3_657  .     -4_557  N
  O11       S1        O11                61.3(6)      1_555  .      2_655  N
  O11       S1        O11               81.8(11)      1_555  .     -3_547  N
  O11       S1        O11               40.5(15)      1_555  .     -4_447  N
  O11       S1        O12             109.01(14)      1_555  .      1_555  N
  O11       S1        O12             139.68(20)      1_555  .      2_655  N
  O11       S1        O12              70.22(30)      1_555  .     -3_546  N
  O11       S1        O12                50.0(5)      1_555  .     -4_446  N
  O11       S1        O13             108.91(14)      1_555  .      1_555  N
  O11       S1        O13                50.7(6)      1_555  .      2_655  N
  O11       S1        O13                28.1(4)      1_555  .     -3_546  N
  O11       S1        O13                86.9(6)      1_555  .     -4_446  N
  O11       S1        F11               133.6(4)      1_555  .     -3_657  N
  O11       S1        F11               165.0(4)      1_555  .     -4_557  N
  O11       S1        O11               40.5(15)      2_655  .     -3_547  N
  O11       S1        O11               81.8(11)      2_655  .     -4_447  N
  O11       S1        O12             139.68(20)      2_655  .      1_555  N
  O11       S1        O12             109.01(14)      2_655  .      2_655  N
  O11       S1        O12                50.0(5)      2_655  .     -3_546  N
  O11       S1        O12              70.22(30)      2_655  .     -4_446  N
  O11       S1        O13                50.7(6)      2_655  .      1_555  N
  O11       S1        O13             108.91(14)      2_655  .      2_655  N
  O11       S1        O13                86.9(6)      2_655  .     -3_546  N
  O11       S1        O13                28.1(4)      2_655  .     -4_446  N
  O11       S1        F11               165.0(4)      2_655  .     -3_657  N
  O11       S1        F11               133.6(4)      2_655  .     -4_557  N
  O11       S1        O11                74.6(7)     -3_547  .     -4_447  N
  O11       S1        O12              101.9(14)     -3_546  .      1_555  N
  O11       S1        O12               71.7(14)     -3_546  .      2_655  N
  O11       S1        O12               88.6(10)     -3_546  .     -3_546  N
  O11       S1        O12              109.8(13)     -3_546  .     -4_446  N
  O11       S1        O13                32.9(5)     -3_546  .      1_555  N
  O11       S1        O13             107.32(32)     -3_546  .      2_655  N
  O11       S1        O13               109.4(8)     -3_546  .     -3_546  N
  O11       S1        O13                49.4(7)     -3_546  .     -4_446  N
  O11       S1        F11              131.3(15)     -3_657  .     -3_657  N
  O11       S1        F11              109.4(11)     -3_657  .     -4_557  N
  O11       S1        O12               71.7(14)     -4_446  .      1_555  N
  O11       S1        O12              101.9(14)     -4_446  .      2_655  N
  O11       S1        O12              109.8(13)     -4_446  .     -3_546  N
  O11       S1        O12               88.6(10)     -4_446  .     -4_446  N
  O11       S1        O13             107.32(32)     -4_446  .      1_555  N
  O11       S1        O13                32.9(5)     -4_446  .      2_655  N
  O11       S1        O13                49.4(7)     -4_446  .     -3_546  N
  O11       S1        O13               109.4(8)     -4_446  .     -4_446  N
  O11       S1        F11              109.4(11)     -4_557  .     -3_657  N
  O11       S1        F11              131.3(15)     -4_557  .     -4_557  N
  O12       S1        O12                50.7(6)      1_555  .      2_655  N
  O12       S1        O12               169.3(4)      1_555  .     -3_546  N
  O12       S1        O12               136.6(6)      1_555  .     -4_446  N
  O12       S1        O13             108.92(14)      1_555  .      1_555  N
  O12       S1        O13                61.4(6)      1_555  .      2_655  N
  O12       S1        O13                97.7(9)      1_555  .     -3_546  N
  O12       S1        O13              146.0(10)      1_555  .     -4_446  N
  O12       S1        F11                42.7(4)      1_555  .     -3_657  N
  O12       S1        F11                59.8(4)      1_555  .     -4_557  N
  O12       S1        O12               136.6(6)      2_655  .     -3_546  N
  O12       S1        O12               169.3(4)      2_655  .     -4_446  N
  O12       S1        O13                61.4(6)      2_655  .      1_555  N
  O12       S1        O13             108.92(14)      2_655  .      2_655  N
  O12       S1        O13              146.0(10)      2_655  .     -3_546  N
  O12       S1        O13                97.7(9)      2_655  .     -4_446  N
  O12       S1        F11                59.8(4)      2_655  .     -3_657  N
  O12       S1        F11                42.7(4)      2_655  .     -4_557  N
  O12       S1        O12                34.8(6)     -3_546  .     -4_446  N
  O12       S1        O13              80.99(34)     -3_546  .      1_555  N
  O12       S1        O13               113.8(5)     -3_546  .      2_655  N
  O12       S1        O13               76.7(10)     -3_546  .     -3_546  N
  O12       S1        O13                44.3(7)     -3_546  .     -4_446  N
  O12       S1        F11               130.0(5)     -3_657  .     -3_657  N
  O12       S1        F11             118.73(34)     -3_657  .     -4_557  N
  O12       S1        O13               113.8(5)     -4_446  .      1_555  N
  O12       S1        O13              80.99(34)     -4_446  .      2_655  N
  O12       S1        O13                44.3(7)     -4_446  .     -3_546  N
  O12       S1        O13               76.7(10)     -4_446  .     -4_446  N
  O12       S1        F11             118.73(34)     -4_557  .     -3_657  N
  O12       S1        F11               130.0(5)     -4_557  .     -4_557  N
  O13       S1        O13             139.51(30)      1_555  .      2_655  N
  O13       S1        O13               136.6(5)      1_555  .     -3_546  N
  O13       S1        O13               37.2(11)      1_555  .     -4_446  N
  O13       S1        F11               115.0(5)      1_555  .     -3_657  N
  O13       S1        F11                85.1(4)      1_555  .     -4_557  N
  O13       S1        O13               37.2(11)      2_655  .     -3_546  N
  O13       S1        O13               136.6(5)      2_655  .     -4_446  N
  O13       S1        F11                85.1(4)      2_655  .     -3_657  N
  O13       S1        F11               115.0(5)      2_655  .     -4_557  N
  O13       S1        O13              108.5(14)     -3_546  .     -4_446  N
  O13       S1        F11               107.9(4)     -3_657  .     -3_657  N
  O13       S1        F11               138.4(4)     -3_657  .     -4_557  N
  O13       S1        F11               138.4(4)     -4_557  .     -3_657  N
  O13       S1        F11               107.9(4)     -4_557  .     -4_557  N
  F11       S1        F11                31.4(5)     -3_657  .     -4_557  N
  S1        C1        S1                 20.4(8)      1_555  .     -3_656  N
  S1        C1        C1               63.37(29)      1_555  .     -3_547  N
  S1        C1        F11             110.00(14)      1_555  .      1_555  N
  S1        C1        F11             110.00(14)      1_555  .      2_655  N
  S1        C1        F12             109.95(14)      1_555  .      1_555  N
  S1        C1        F12             109.95(14)      1_555  .      2_655  N
  S1        C1        F12                85.9(4)      1_555  .     -3_657  N
  S1        C1        F12                85.9(4)      1_555  .     -4_557  N
  S1        C1        F13             109.89(14)      1_555  .      1_555  N
  S1        C1        F13             109.89(14)      1_555  .      2_655  N
  S1        C1        F13              128.2(11)      1_555  .     -3_657  N
  S1        C1        F13              128.2(11)      1_555  .     -4_557  N
  S1        C1        C1                 83.8(6)     -3_547  .     -3_547  N
  S1        C1        F11                91.8(7)     -3_657  .      1_555  N
  S1        C1        F11                91.8(7)     -3_657  .      2_655  N
  S1        C1        F12             109.29(19)     -3_657  .      1_555  N
  S1        C1        F12             109.29(19)     -3_657  .      2_655  N
  S1        C1        F12                99.9(6)     -3_657  .     -3_657  N
  S1        C1        F12                99.9(6)     -3_657  .     -4_557  N
  S1        C1        F13               126.7(6)     -3_657  .      1_555  N
  S1        C1        F13               126.7(6)     -3_657  .      2_655  N
  S1        C1        F13               139.5(8)     -3_657  .     -3_657  N
  S1        C1        F13               139.5(8)     -3_657  .     -4_557  N
  C1        C1        F11             153.30(31)     -3_657  .      1_555  N
  C1        C1        F11             153.30(31)     -3_657  .      2_655  N
  C1        C1        F12              97.23(29)     -3_657  .      1_555  N
  C1        C1        F12              97.23(29)     -3_657  .      2_655  N
  C1        C1        F12                49.6(5)     -3_657  .     -3_657  N
  C1        C1        F12                49.6(5)     -3_657  .     -4_557  N
  C1        C1        F13                55.8(4)     -3_657  .      1_555  N
  C1        C1        F13                55.8(4)     -3_657  .      2_655  N
  C1        C1        F13               79.1(12)     -3_657  .     -3_657  N
  C1        C1        F13               79.1(12)     -3_657  .     -4_557  N
  F11       C1        F11                52.8(7)      1_555  .      2_655  N
  F11       C1        F12             109.03(14)      1_555  .      1_555  N
  F11       C1        F12                59.4(6)      1_555  .      2_655  N
  F11       C1        F12               105.9(6)      1_555  .     -3_657  N
  F11       C1        F12               156.3(6)      1_555  .     -4_557  N
  F11       C1        F13             108.93(14)      1_555  .      1_555  N
  F11       C1        F13             139.95(19)      1_555  .      2_655  N
  F11       C1        F13              118.8(13)      1_555  .     -3_657  N
  F11       C1        F13               87.6(13)      1_555  .     -4_557  N
  F11       C1        F12                59.4(6)      2_655  .      1_555  N
  F11       C1        F12             109.03(14)      2_655  .      2_655  N
  F11       C1        F12               156.3(6)      2_655  .     -3_657  N
  F11       C1        F12               105.9(6)      2_655  .     -4_557  N
  F11       C1        F13             139.95(19)      2_655  .      1_555  N
  F11       C1        F13             108.93(14)      2_655  .      2_655  N
  F11       C1        F13               87.6(13)      2_655  .     -3_657  N
  F11       C1        F13              118.8(13)      2_655  .     -4_557  N
  F12       C1        F12             139.94(29)      1_555  .      2_655  N
  F12       C1        F12               132.9(5)      1_555  .     -3_657  N
  F12       C1        F12                47.6(6)      1_555  .     -4_557  N
  F12       C1        F13             109.02(14)      1_555  .      1_555  N
  F12       C1        F13                52.7(6)      1_555  .      2_655  N
  F12       C1        F13                38.8(6)      1_555  .     -3_657  N
  F12       C1        F13             109.06(22)      1_555  .     -4_557  N
  F12       C1        F12                47.6(6)      2_655  .     -3_657  N
  F12       C1        F12               132.9(5)      2_655  .     -4_557  N
  F12       C1        F13                52.7(6)      2_655  .      1_555  N
  F12       C1        F13             109.02(14)      2_655  .      2_655  N
  F12       C1        F13             109.06(22)      2_655  .     -3_657  N
  F12       C1        F13                38.8(6)      2_655  .     -4_557  N
  F12       C1        F12                92.3(9)     -3_657  .     -4_557  N
  F12       C1        F13              27.91(34)     -3_657  .      1_555  N
  F12       C1        F13                80.3(4)     -3_657  .      2_655  N
  F12       C1        F13               96.3(10)     -3_657  .     -3_657  N
  F12       C1        F13                42.3(9)     -3_657  .     -4_557  N
  F12       C1        F13                80.3(4)     -4_557  .      1_555  N
  F12       C1        F13              27.91(34)     -4_557  .      2_655  N
  F12       C1        F13                42.3(9)     -4_557  .     -3_657  N
  F12       C1        F13               96.3(10)     -4_557  .     -4_557  N
  F13       C1        F13                59.5(7)      1_555  .      2_655  N
  F13       C1        F13                70.5(7)      1_555  .     -3_657  N
  F13       C1        F13               23.3(15)      1_555  .     -4_557  N
  F13       C1        F13               23.3(15)      2_655  .     -3_657  N
  F13       C1        F13                70.5(7)      2_655  .     -4_557  N
  F13       C1        F13                72.1(6)     -3_657  .     -4_557  N
  Rb1       O11       Rb1              82.14(31)    101_555  .    103_555  N
  Rb1       O11       S1                129.3(4)    101_555  .      1_555  N
  Rb1       O11       S1               109.7(12)    101_555  .     -3_656  N
  Rb1       O11       O11             127.05(20)    101_555  .      2_655  N
  Rb1       O11       O11              158.4(10)    101_555  .     -3_547  N
  Rb1       O11       O11             141.46(19)    101_555  .     -4_447  N
  Rb1       O11       O12                52.0(7)    101_555  .     -4_446  N
  Rb1       O11       O13               106.5(5)    101_555  .      2_655  N
  Rb1       O11       O13               57.0(22)    101_555  .     -3_546  N
  Rb1       O11       S1                138.1(5)    103_555  .      1_555  N
  Rb1       O11       S1               164.4(16)    103_555  .     -3_656  N
  Rb1       O11       O11             128.38(15)    103_555  .      2_655  N
  Rb1       O11       O11               116.3(7)    103_555  .     -3_547  N
  Rb1       O11       O11              81.52(31)    103_555  .     -4_447  N
  Rb1       O11       O12               133.9(9)    103_555  .     -4_446  N
  Rb1       O11       O13                86.6(8)    103_555  .      2_655  N
  Rb1       O11       O13               95.3(13)    103_555  .     -3_546  N
  S1        O11       S1                26.3(12)      1_555  .     -3_656  N
  S1        O11       O11              59.33(32)      1_555  .      2_655  N
  S1        O11       O11                43.4(4)      1_555  .     -3_547  N
  S1        O11       O11              56.60(28)      1_555  .     -4_447  N
  S1        O11       O12                83.9(8)      1_555  .     -4_446  N
  S1        O11       O13                60.5(8)      1_555  .      2_655  N
  S1        O11       O13               84.6(17)      1_555  .     -3_546  N
  S1        O11       O11                52.7(4)     -3_547  .      2_655  N
  S1        O11       O11                54.8(7)     -3_547  .     -3_547  N
  S1        O11       O11               82.9(13)     -3_547  .     -4_447  N
  S1        O11       O12               59.4(10)     -3_546  .     -4_446  N
  S1        O11       O13               80.4(13)     -3_546  .      2_655  N
  S1        O11       O13               83.5(14)     -3_546  .     -3_546  N
  O11       O11       O11                32.7(9)      2_655  .     -3_547  N
  O11       O11       O11           90.00000(10)      2_655  .     -4_447  N
  O11       O11       O12                84.7(6)      2_655  .     -4_446  N
  O11       O11       O13               116.1(8)      2_655  .      2_655  N
  O11       O11       O13              135.8(13)      2_655  .     -3_546  N
  O11       O11       O11                57.3(9)     -3_547  .     -4_447  N
  O11       O11       O12               108.1(9)     -3_546  .     -4_446  N
  O11       O11       O13               86.8(11)     -3_546  .      2_655  N
  O11       O11       O13              127.2(22)     -3_546  .     -3_546  N
  O11       O11       O12               136.0(8)     -4_446  .     -4_446  N
  O11       O11       O13                37.9(4)     -4_446  .      2_655  N
  O11       O11       O13               90.1(23)     -4_446  .     -3_546  N
  O12       O11       O13               108.2(8)     -4_446  .      2_655  N
  O12       O11       O13               65.4(19)     -4_446  .     -3_546  N
  O13       O11       O13               52.2(22)      2_655  .     -3_546  N
  Rb1       O12       S1                146.4(5)    101_556  .      1_555  N
  Rb1       O12       S1                139.7(5)    101_556  .     -3_656  N
  Rb1       O12       O11               100.9(6)    101_556  .     -4_447  N
  Rb1       O12       O12             143.55(23)    101_556  .      2_655  N
  Rb1       O12       O13                88.7(7)    101_556  .      2_655  N
  Rb1       O12       F11               100.0(8)    101_556  .     -3_657  N
  Rb1       O12       F11               129.2(8)    101_556  .     -4_557  N
  S1        O12       S1                8.09(26)      1_555  .     -3_656  N
  S1        O12       O11                48.8(8)      1_555  .     -4_447  N
  S1        O12       O12              64.65(32)      1_555  .      2_655  N
  S1        O12       O13                57.8(8)      1_555  .      2_655  N
  S1        O12       F11                97.2(9)      1_555  .     -3_657  N
  S1        O12       F11                80.4(7)      1_555  .     -4_557  N
  S1        O12       O11                46.2(8)     -3_547  .     -4_447  N
  S1        O12       O12              72.61(30)     -3_546  .      2_655  N
  S1        O12       O13                51.2(7)     -3_546  .      2_655  N
  S1        O12       F11                96.2(9)     -3_657  .     -3_657  N
  S1        O12       F11                84.2(6)     -3_657  .     -4_557  N
  O11       O12       O12                95.3(6)     -4_446  .      2_655  N
  O11       O12       O13                28.6(7)     -4_446  .      2_655  N
  O11       O12       F11              137.2(15)     -4_557  .     -3_657  N
  O11       O12       F11              129.0(12)     -4_557  .     -4_557  N
  O12       O12       O13               118.6(6)      2_655  .      2_655  N
  O12       O12       F11                89.4(6)      2_655  .     -3_657  N
  O12       O12       F11              51.23(33)      2_655  .     -4_557  N
  O13       O12       F11               116.2(9)      2_655  .     -3_657  N
  O13       O12       F11              129.8(10)      2_655  .     -4_557  N
  F11       O12       F11                38.2(6)     -3_657  .     -4_557  N
  Rb1       O13       Rb1              84.90(30)    101_456  .    103_455  N
  Rb1       O13       S1                124.0(5)    101_456  .      1_555  N
  Rb1       O13       S1               147.5(10)    101_456  .     -3_656  N
  Rb1       O13       O11               154.8(7)    101_456  .      2_655  N
  Rb1       O13       O11              110.9(23)    101_456  .     -3_547  N
  Rb1       O13       O12                63.2(6)    101_456  .      2_655  N
  Rb1       O13       O13             150.48(23)    101_456  .     -4_446  N
  Rb1       O13       S1                133.2(4)    103_455  .      1_555  N
  Rb1       O13       S1                122.2(7)    103_455  .     -3_656  N
  Rb1       O13       O11                72.5(8)    103_455  .      2_655  N
  Rb1       O13       O11               72.1(12)    103_455  .     -3_547  N
  Rb1       O13       O12               131.7(7)    103_455  .      2_655  N
  Rb1       O13       O13              81.88(26)    103_455  .     -4_446  N
  S1        O13       S1                 24.3(8)      1_555  .     -3_656  N
  S1        O13       O11                68.8(9)      1_555  .      2_655  N
  S1        O13       O11               63.6(14)      1_555  .     -3_547  N
  S1        O13       O12                60.8(7)      1_555  .      2_655  N
  S1        O13       O13              83.54(33)      1_555  .     -4_446  N
  S1        O13       O11                50.2(9)     -3_547  .      2_655  N
  S1        O13       O11               67.3(17)     -3_547  .     -3_547  N
  S1        O13       O12               84.5(10)     -3_546  .      2_655  N
  S1        O13       O13                59.3(9)     -3_546  .     -4_446  N
  O11       O13       O11               52.0(25)      2_655  .     -3_547  N
  O11       O13       O12              125.2(12)      2_655  .      2_655  N
  O11       O13       O13                37.9(4)      2_655  .     -4_446  N
  O11       O13       O12               85.9(21)     -3_546  .      2_655  N
  O11       O13       O13               89.9(23)     -3_546  .     -4_446  N
  O12       O13       O13               141.9(7)      2_655  .     -4_446  N
  Rb1       F11       S1               90.03(21)    101_455  .     -3_656  N
  Rb1       F11       C1                135.8(4)    101_455  .      1_555  N
  Rb1       F11       O12                53.6(6)    101_455  .     -3_546  N
  Rb1       F11       O12                87.6(4)    101_455  .     -4_446  N
  Rb1       F11       F11             131.49(18)    101_455  .      2_655  N
  Rb1       F11       F12               155.6(5)    101_455  .      1_555  N
  Rb1       F11       F12               101.3(5)    101_455  .      2_655  N
  Rb1       F11       F13               128.9(4)    101_455  .      1_555  N
  Rb1       F11       F13               164.4(7)    101_455  .     -3_657  N
  Rb1       F11       F13               131.5(6)    101_455  .     -4_557  N
  S1        F11       C1                 50.7(5)     -3_547  .      1_555  N
  S1        F11       O12                40.1(6)     -3_546  .     -3_546  N
  S1        F11       O12                39.8(5)     -3_546  .     -4_446  N
  S1        F11       F11              74.29(25)     -3_657  .      2_655  N
  S1        F11       F12                70.2(4)     -3_657  .      1_555  N
  S1        F11       F12                88.5(8)     -3_657  .      2_655  N
  S1        F11       F13                78.0(6)     -3_657  .      1_555  N
  S1        F11       F13                77.0(6)     -3_657  .     -3_657  N
  S1        F11       F13                86.5(9)     -3_657  .     -4_557  N
  C1        F11       O12               90.8(10)      1_555  .     -3_546  N
  C1        F11       O12                74.2(7)      1_555  .     -4_446  N
  C1        F11       F11              63.61(33)      1_555  .      2_655  N
  C1        F11       F12              36.94(30)      1_555  .      1_555  N
  C1        F11       F12                63.9(8)      1_555  .      2_655  N
  C1        F11       F13              36.93(27)      1_555  .      1_555  N
  C1        F11       F13                28.9(5)      1_555  .     -3_657  N
  C1        F11       F13                43.1(6)      1_555  .     -4_557  N
  O12       F11       O12                39.4(7)     -3_546  .     -4_446  N
  O12       F11       F11                90.6(6)     -3_657  .      2_655  N
  O12       F11       F12               102.8(9)     -3_657  .      1_555  N
  O12       F11       F12               110.0(8)     -3_657  .      2_655  N
  O12       F11       F13              113.7(10)     -3_657  .      1_555  N
  O12       F11       F13              115.9(10)     -3_657  .     -3_657  N
  O12       F11       F13              122.3(13)     -3_657  .     -4_557  N
  O12       F11       F11              51.23(33)     -4_557  .      2_655  N
  O12       F11       F12                68.1(5)     -4_557  .      1_555  N
  O12       F11       F12              128.0(11)     -4_557  .      2_655  N
  O12       F11       F13               110.2(9)     -4_557  .      1_555  N
  O12       F11       F13                87.9(6)     -4_557  .     -3_657  N
  O12       F11       F13              117.3(11)     -4_557  .     -4_557  N
  F11       F11       F12                30.6(4)      2_655  .      1_555  N
  F11       F11       F12               123.3(6)      2_655  .      2_655  N
  F11       F11       F13                92.9(4)      2_655  .      1_555  N
  F11       F11       F13                53.4(4)      2_655  .     -3_657  N
  F11       F11       F13                93.8(5)      2_655  .     -4_557  N
  F12       F11       F12                92.6(9)      1_555  .      2_655  N
  F12       F11       F13                62.3(4)      1_555  .      1_555  N
  F12       F11       F13                23.4(4)      1_555  .     -3_657  N
  F12       F11       F13                63.4(4)      1_555  .     -4_557  N
  F12       F11       F13                30.3(7)      2_655  .      1_555  N
  F12       F11       F13                70.2(7)      2_655  .     -3_657  N
  F12       F11       F13                30.4(7)      2_655  .     -4_557  N
  F13       F11       F13                40.3(5)      1_555  .     -3_657  N
  F13       F11       F13                 8.7(6)      1_555  .     -4_557  N
  F13       F11       F13                40.3(6)     -3_657  .     -4_557  N
  Rb1       F12       C1              102.69(34)    101_555  .      1_555  N
  Rb1       F12       C1              121.26(35)    101_555  .     -3_547  N
  Rb1       F12       F11                82.9(4)    101_555  .      1_555  N
  Rb1       F12       F11                58.1(4)    101_555  .      2_655  N
  Rb1       F12       F12             129.43(13)    101_555  .     -4_557  N
  Rb1       F12       F13               160.2(7)    101_555  .      2_655  N
  Rb1       F12       F13              157.0(13)    101_555  .     -3_657  N
  Rb1       F12       F13               129.3(6)    101_555  .     -4_557  N
  C1        F12       C1                 33.2(6)      1_555  .     -3_547  N
  C1        F12       F11              34.03(30)      1_555  .      1_555  N
  C1        F12       F11                56.7(8)      1_555  .      2_655  N
  C1        F12       F12              82.77(29)      1_555  .     -4_557  N
  C1        F12       F13                63.5(8)      1_555  .      2_655  N
  C1        F12       F13               56.7(11)      1_555  .     -3_657  N
  C1        F12       F13              31.92(29)      1_555  .     -4_557  N
  C1        F12       F11                67.1(7)     -3_657  .      1_555  N
  C1        F12       F11                89.1(9)     -3_657  .      2_655  N
  C1        F12       F12                49.6(5)     -3_657  .     -4_557  N
  C1        F12       F13                39.7(7)     -3_657  .      2_655  N
  C1        F12       F13               47.9(12)     -3_657  .     -3_657  N
  C1        F12       F13                40.9(5)     -3_657  .     -4_557  N
  F11       F12       F11                26.1(5)      1_555  .      2_655  N
  F11       F12       F12               116.7(4)      1_555  .     -4_557  N
  F11       F12       F13                90.5(9)      1_555  .      2_655  N
  F11       F12       F13               74.1(14)      1_555  .     -3_657  N
  F11       F12       F13                47.0(7)      1_555  .     -4_557  N
  F11       F12       F12               137.4(7)      2_655  .     -4_557  N
  F11       F12       F13              116.6(12)      2_655  .      2_655  N
  F11       F12       F13               99.2(15)      2_655  .     -3_657  N
  F11       F12       F13                72.9(8)      2_655  .     -4_557  N
  F12       F12       F13                39.3(4)     -4_557  .      2_655  N
  F12       F12       F13               63.1(15)     -4_557  .     -3_657  N
  F12       F12       F13                79.1(7)     -4_557  .     -4_557  N
  F13       F12       F13               23.8(16)      2_655  .     -3_657  N
  F13       F12       F13               44.4(10)      2_655  .     -4_557  N
  F13       F12       F13                27.8(8)     -3_657  .     -4_557  N
  C1        F13       C1                45.0(11)      1_555  .     -3_547  N
  C1        F13       F11              34.14(27)      1_555  .      1_555  N
  C1        F13       F11                75.9(6)      1_555  .     -3_657  N
  C1        F13       F11                91.8(7)      1_555  .     -4_557  N
  C1        F13       F12                63.8(9)      1_555  .      2_655  N
  C1        F13       F12              104.2(13)      1_555  .     -3_657  N
  C1        F13       F12                58.8(6)      1_555  .     -4_557  N
  C1        F13       F13              60.25(33)      1_555  .      2_655  N
  C1        F13       F13                47.9(5)      1_555  .     -3_657  N
  C1        F13       F13                55.8(4)      1_555  .     -4_557  N
  C1        F13       F11               77.1(11)     -3_657  .      1_555  N
  C1        F13       F11                32.3(8)     -3_657  .     -3_657  N
  C1        F13       F11               49.3(10)     -3_657  .     -4_557  N
  C1        F13       F12               98.0(14)     -3_657  .      2_655  N
  C1        F13       F12               84.5(12)     -3_657  .     -3_657  N
  C1        F13       F12              39.01(33)     -3_657  .     -4_557  N
  C1        F13       F13              53.93(31)     -3_657  .      2_655  N
  C1        F13       F13                61.7(4)     -3_657  .     -3_657  N
  C1        F13       F13              100.9(12)     -3_657  .     -4_557  N
  F11       F13       F11               109.1(7)      1_555  .     -3_657  N
  F11       F13       F11               116.2(8)      1_555  .     -4_557  N
  F11       F13       F12                33.1(8)      1_555  .      2_655  N
  F11       F13       F12              100.8(15)      1_555  .     -3_657  N
  F11       F13       F12                90.8(7)      1_555  .     -4_557  N
  F11       F13       F13                87.1(4)      1_555  .      2_655  N
  F11       F13       F13                67.6(9)      1_555  .     -3_657  N
  F11       F13       F13                27.5(4)      1_555  .     -4_557  N
  F11       F13       F11                32.8(7)     -3_657  .     -4_557  N
  F11       F13       F12               128.3(9)     -3_657  .      2_655  N
  F11       F13       F12               82.6(15)     -3_657  .     -3_657  N
  F11       F13       F12              36.92(33)     -3_657  .     -4_557  N
  F11       F13       F13                53.4(4)     -3_657  .      2_655  N
  F11       F13       F13                72.1(6)     -3_657  .     -3_657  N
  F11       F13       F13               130.5(6)     -3_657  .     -4_557  N
  F11       F13       F12               115.5(7)     -4_557  .      2_655  N
  F11       F13       F12               50.4(11)     -4_557  .     -3_657  N
  F11       F13       F12                69.6(7)     -4_557  .     -4_557  N
  F11       F13       F13                86.2(5)     -4_557  .      2_655  N
  F11       F13       F13              104.0(12)     -4_557  .     -3_657  N
  F11       F13       F13               143.8(6)     -4_557  .     -4_557  N
  F12       F13       F12               77.6(14)      2_655  .     -3_657  N
  F12       F13       F12              122.6(12)      2_655  .     -4_557  N
  F12       F13       F13               120.2(7)      2_655  .      2_655  N
  F12       F13       F13              100.1(15)      2_655  .     -3_657  N
  F12       F13       F13                39.3(4)      2_655  .     -4_557  N
  F12       F13       F12              117.8(15)     -3_657  .     -4_557  N
  F12       F13       F13              135.0(11)     -3_657  .      2_655  N
  F12       F13       F13              145.6(11)     -3_657  .     -3_657  N
  F12       F13       F13              116.9(15)     -3_657  .     -4_557  N
  F12       F13       F13                17.2(4)     -4_557  .      2_655  N
  F12       F13       F13                35.5(7)     -4_557  .     -3_657  N
  F12       F13       F13               100.9(7)     -4_557  .     -4_557  N
  F13       F13       F13               22.1(12)      2_655  .     -3_657  N
  F13       F13       F13           90.00000(20)      2_655  .     -4_557  N
  F13       F13       F13               67.9(12)     -3_657  .     -4_557  N
#--eof--eof--eof--eof--eof--eof--eof--eof--eof--eof--eof--eof--eof--eof--eof--#
